# Supplementary material
Source: ML conference proceedings conference paper supplement (https://proceedings.mlr.press/v130/zhou21a.html)
Supplement: Supplementary file 1 [file zhou21a-supp.pdf]

## A More Empirical Study Details for Section 3

---

### Algorithm 2 Baselines (the three curricula) in Section 3

---

```

1: input:  $\{(x_i, y_i)\}_{i=1}^n, \ell(\cdot, \cdot), f(\cdot; \theta), \{\eta_t\}_{t=0}^{T_\kappa}, \{T_i\}_{i=0}^\kappa, k$ 
2: initialize:  $\theta, T_{-1} = 0, k = n, \rho_i = 0, g_i = f(x_i) \ \forall i \in [n]$ 
3: for  $j \in \{0, \dots, \kappa\}$  do
4:   for  $t \in \{T_{j-1}, \dots, T_j\}$  do
5:     if  $j > 0$  then
6:       Baseline1: Alternating between the highest and lowest scored samples:
7:       if  $j \% 2 = 1$  then
8:          $S_t \leftarrow$  top- $k$  samples with the largest score  $\hat{a}_t(i)$ ;
9:       else
10:         $S_t \leftarrow$  top- $k$  samples with the smallest score  $\hat{a}_t(i)$ ;
11:      end if
12:      Baseline2: always selecting the highest-scored samples:
13:       $S_t \leftarrow$  top- $k$  samples with the largest score  $\hat{a}_t(i)$ ;
14:      Baseline3: always selecting the lowest-scored samples:
15:       $S_t \leftarrow$  top- $k$  samples with the smallest score  $\hat{a}_t(i)$ ;
16:      Update  $\theta$  by mini-batch SGD with learning rate  $\eta_t$  to minimize the task's loss  $\ell(\cdot)$  on  $S_t$ ;
17:    end if
18:    Estimate linear dynamics  $\left. \frac{\partial f(x_i; \theta_t)}{\partial t} \right|_D$  and compute scores  $\hat{a}_{t+1}(i)$ :
19:    Uniform sampling  $D \subseteq [n]$  up to size  $n$ ;
20:    Update  $\theta$  by large-batch SGD with learning rate  $\eta_t$  to minimize L2 loss on  $D$ ;
21:    Compute  $f(x_i)$  for all samples  $i \in [n]$ ;
22:    for  $i \in \{1, \dots, n\}$  do
23:       $\rho_i \leftarrow \rho_i + \eta_t, \frac{\partial f(x_i)}{\partial t} = \frac{f(x_i) - g_i}{\rho_i}$ ;
24:      Restore  $\rho_i \leftarrow 0$  and  $g_i \leftarrow f(x_i)$ ;
25:      Compute  $a_t(i)$  by Eq. (7) (regression) or Eq. (12) (classification);
26:      Update the exponential moving average  $\hat{a}_{t+1}(i)$  for all samples  $i \in [n]$  using Eq. (8);
27:    end for
28:  end for
29: end for

```

---

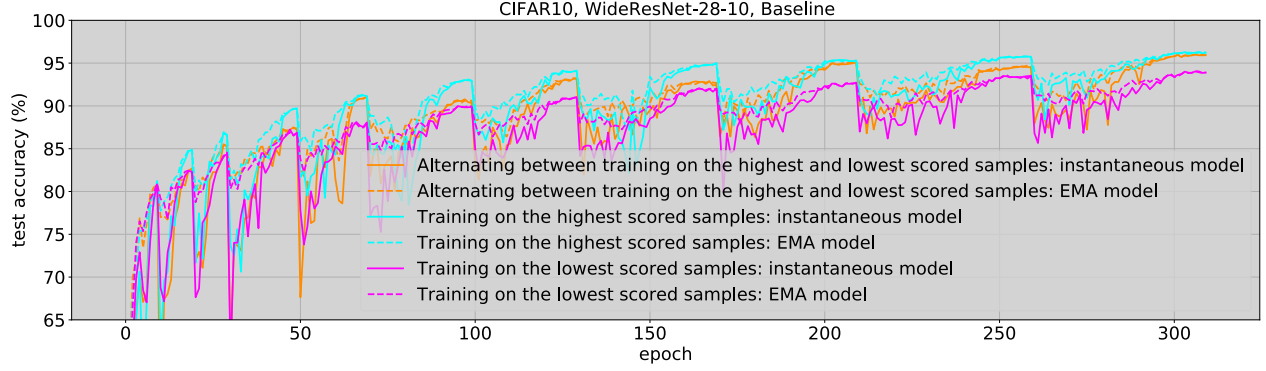

Figure 7: Test set accuracy of WideResNet-28-10 (instantaneous model) and its exponential moving average (EMA model) during the course of training when using the three data selection curricula.

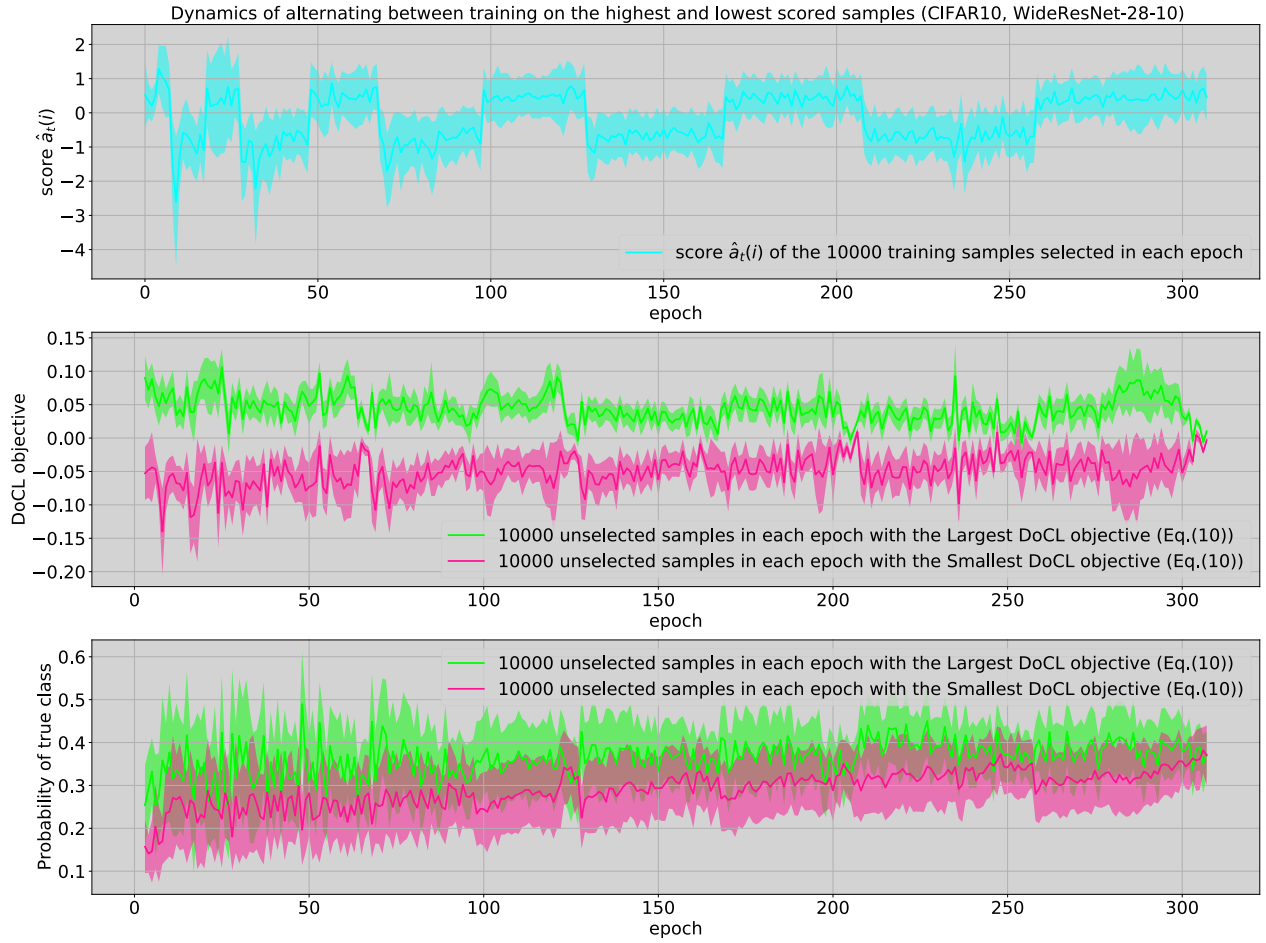

Figure 8: Training alternates between the highest and lowest scored samples: Dynamics (mean $\pm$ std) for **(Top)** the score  $\hat{a}_t(i)$  (Eq. (8)) of the selected samples, **(Middle)** the DoCL objective (Eq. (10)) values of unselected samples, and **(Bottom)** the output true-class probability for unselected samples. We split the unselected samples in each epoch into two groups with the largest/smallest DoCL objective values.

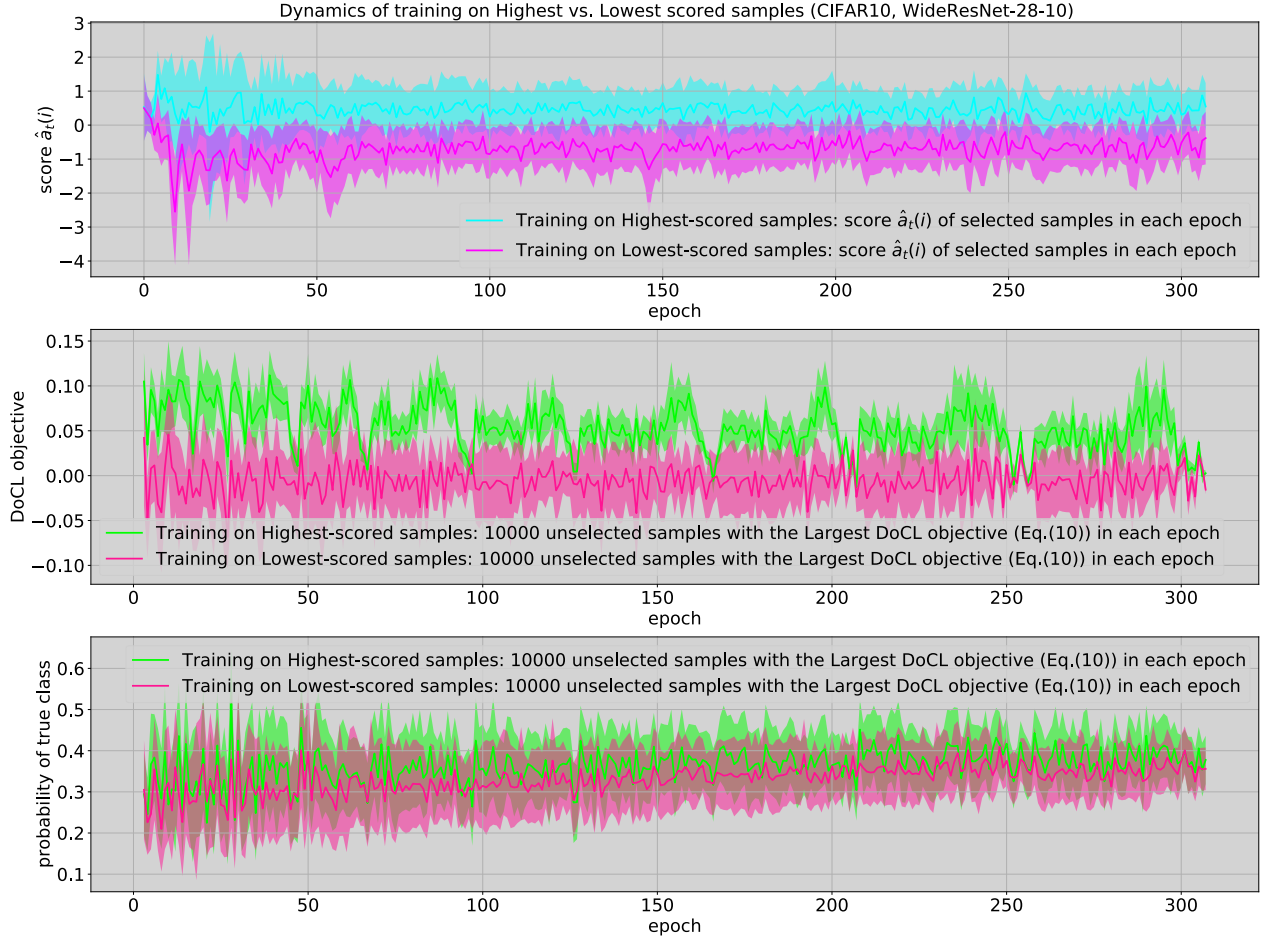

Figure 9: Training with highest-scored vs. lowest-scored samples: Dynamics (mean $\pm$ std) for (**Top**) the score  $\hat{a}(i)$  (Eq. (8)) of the selected samples, (**Middle**) the DoCL objective (Eq. (10)) values and (**Bottom**) the output true-class probability for unselected samples with the largest DoCL objective values.

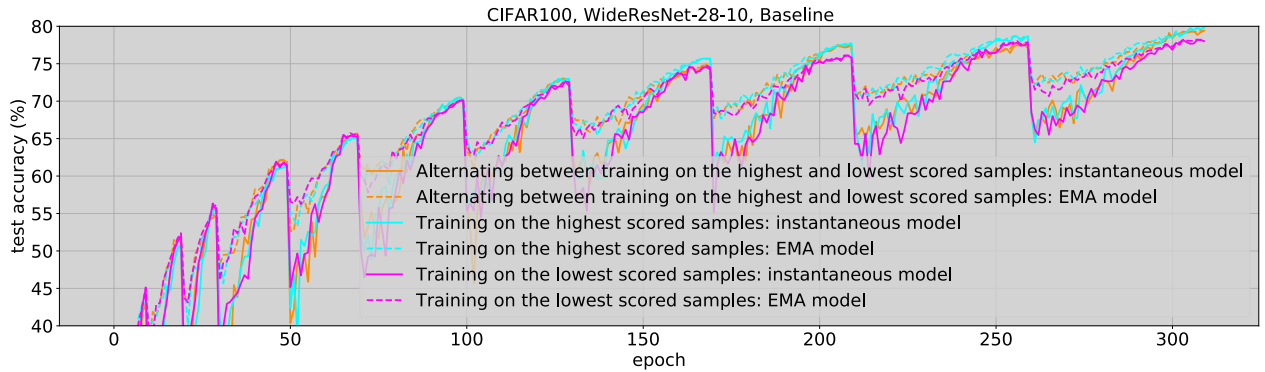

Figure 10: Test set accuracy of WideResNet-28-10 (instantaneous model) and its exponential moving average (EMA model) during the course of training when using the three data selection curricula.

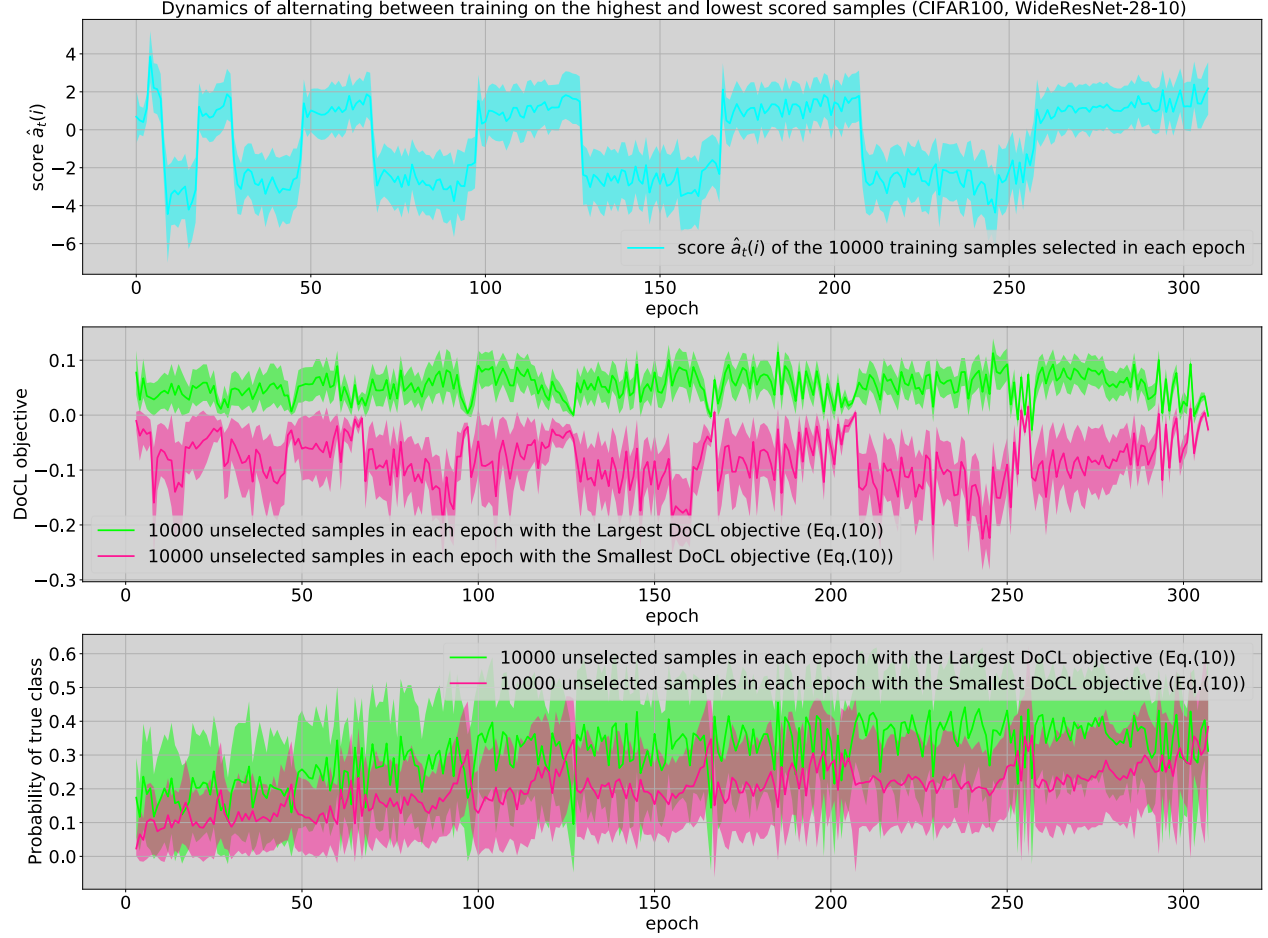

Figure 11: Training alternates between the highest and lowest scored samples: Dynamics (mean $\pm$ std) for **(Top)** the score  $\hat{a}(i)$  (Eq. (8)) of the selected samples, **(Middle)** the DoCL objective (Eq. (10)) values of unselected samples, and **(Bottom)** the output true-class probability for unselected samples. We split the unselected samples in each epoch into two groups with the largest/smallest DoCL objective values.

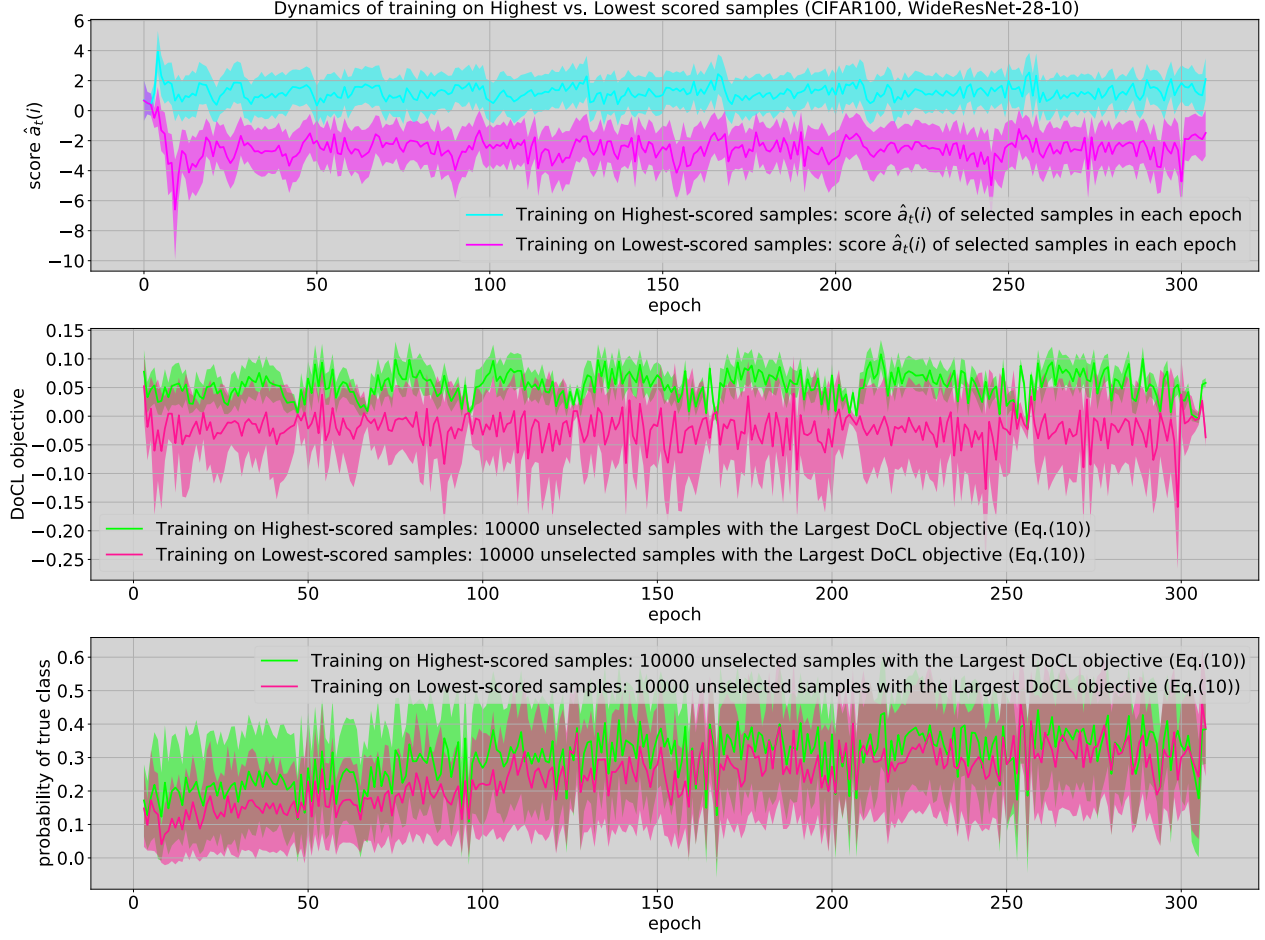

Figure 12: *Training with highest-scored vs. lowest-scored samples*: Dynamics (mean $\pm$ std) for (**Top**) the score  $\hat{a}_t(i)$  (Eq. (8)) of the selected samples, (**Middle**) the DoCL objective (Eq. (10)) values and (**Bottom**) the output true-class probability for unselected samples with the largest DoCL objective values.

## B More Experimental Details for Section 5

On each dataset, for all the methods, we use the same cosine annealing learning rate schedule for multiple episodes. The ending epochs of cycles  $\{T_i\}_{i=0}^{\kappa}$  in our learning rate schedule used on different datasets are listed below.

- CIFAR10, CIFAR100, SVHN, FMNIST: (5, 10, 15, 20, 30, 40, 60, 90, 140, 210, 300);
- ImageNet: (5, 10, 15, 20, 30, 45, 75, 120, 200);
- Food-101, Birdsnap, FGVCaircraft, StanfordCars (double the ImageNet cycles):  
(10, 20, 30, 40, 60, 90, 150, 240, 400) =  $2 \times (5, 10, 15, 20, 30, 45, 75, 120, 200)$ ;

Table 2: Details regarding the datasets and training settings (#Feature denotes the number of features after cropping if applied), “lr\_start” and “lr\_target” denote the starting and target learning rate for the first episode of cosine annealing schedule, they are gradually decayed over the rest episodes.

| Dataset      | CIFAR10            | CIFAR100           | Food-101           | ImageNet           | SVHN               |
|--------------|--------------------|--------------------|--------------------|--------------------|--------------------|
| #Training    | 50000              | 50000              | 75750              | 1281167            | 73257              |
| #Test        | 10000              | 10000              | 25250              | 50000              | 26032              |
| #Feature     | (3, 32, 32)        | (3, 32, 32)        | (3, 224, 224)      | (3, 224, 224)      | (3, 32, 32)        |
| #Class       | 10                 | 100                | 101                | 1000               | 10                 |
| #Epoch $T$   | 300                | 300                | 400                | 200                | 300                |
| BatchSize    | 128                | 128                | 80                 | 256                | 128                |
| lr_start     | $2 \times 10^{-1}$ | $2 \times 10^{-1}$ | $2 \times 10^{-1}$ | $2 \times 10^{-1}$ | $2 \times 10^{-2}$ |
| lr_target    | $5 \times 10^{-4}$ | $5 \times 10^{-4}$ | $1 \times 10^{-4}$ | $1 \times 10^{-4}$ | $1 \times 10^{-3}$ |
| weight decay | $1 \times 10^{-4}$ | $1 \times 10^{-4}$ | $1 \times 10^{-5}$ | $1 \times 10^{-5}$ | $1 \times 10^{-4}$ |

| Dataset      | Birdsnap           | FGVCaircraft       | StanfordCARS       | FMNIST             |
|--------------|--------------------|--------------------|--------------------|--------------------|
| #Training    | 47386              | 6667               | 8144               | 50000              |
| #Test        | 2443               | 3333               | 8041               | 10000              |
| #Feature     | (3, 224, 224)      | (3, 224, 224)      | (3, 224, 224)      | (1, 28, 28)        |
| #Class       | 500                | 100                | 196                | 10                 |
| #Epoch $T$   | 400                | 400                | 400                | 300                |
| BatchSize    | 258                | 256                | 256                | 128                |
| lr_start     | $4 \times 10^{-1}$ | $4 \times 10^{-1}$ | $4 \times 10^{-1}$ | $4 \times 10^{-2}$ |
| lr_target    | $1 \times 10^{-4}$ | $1 \times 10^{-4}$ | $1 \times 10^{-4}$ | $1 \times 10^{-3}$ |
| weight decay | $1 \times 10^{-5}$ | $1 \times 10^{-5}$ | $1 \times 10^{-5}$ | $1 \times 10^{-4}$ |

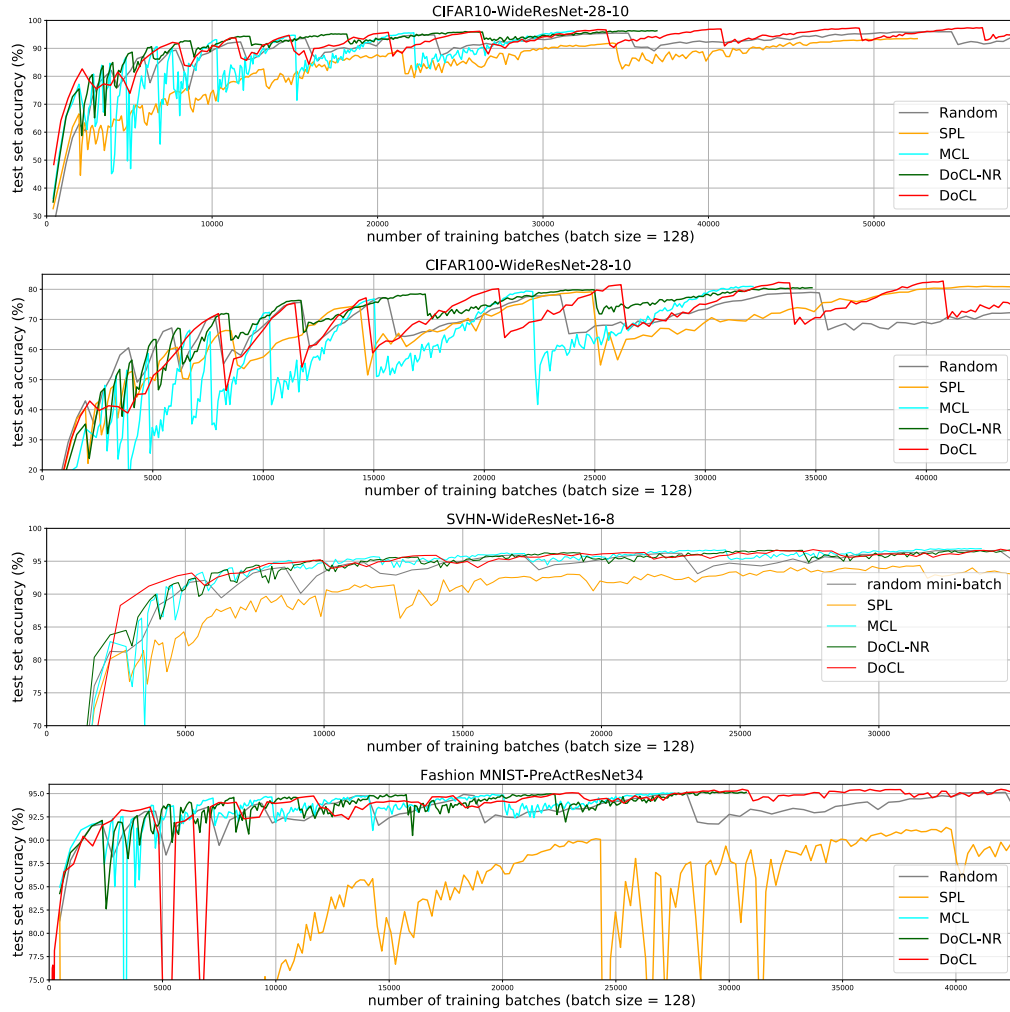

Figure 13: Training DNNs by using DoCL, DoCL-NR, SPL [31], MCL [59], and random mini-batch SGD on 3 datasets, i.e., CIFAR10, CIFAR100, SVHN and Fashion MNIST. We report how the test accuracy changes with the number of training batches for each method.

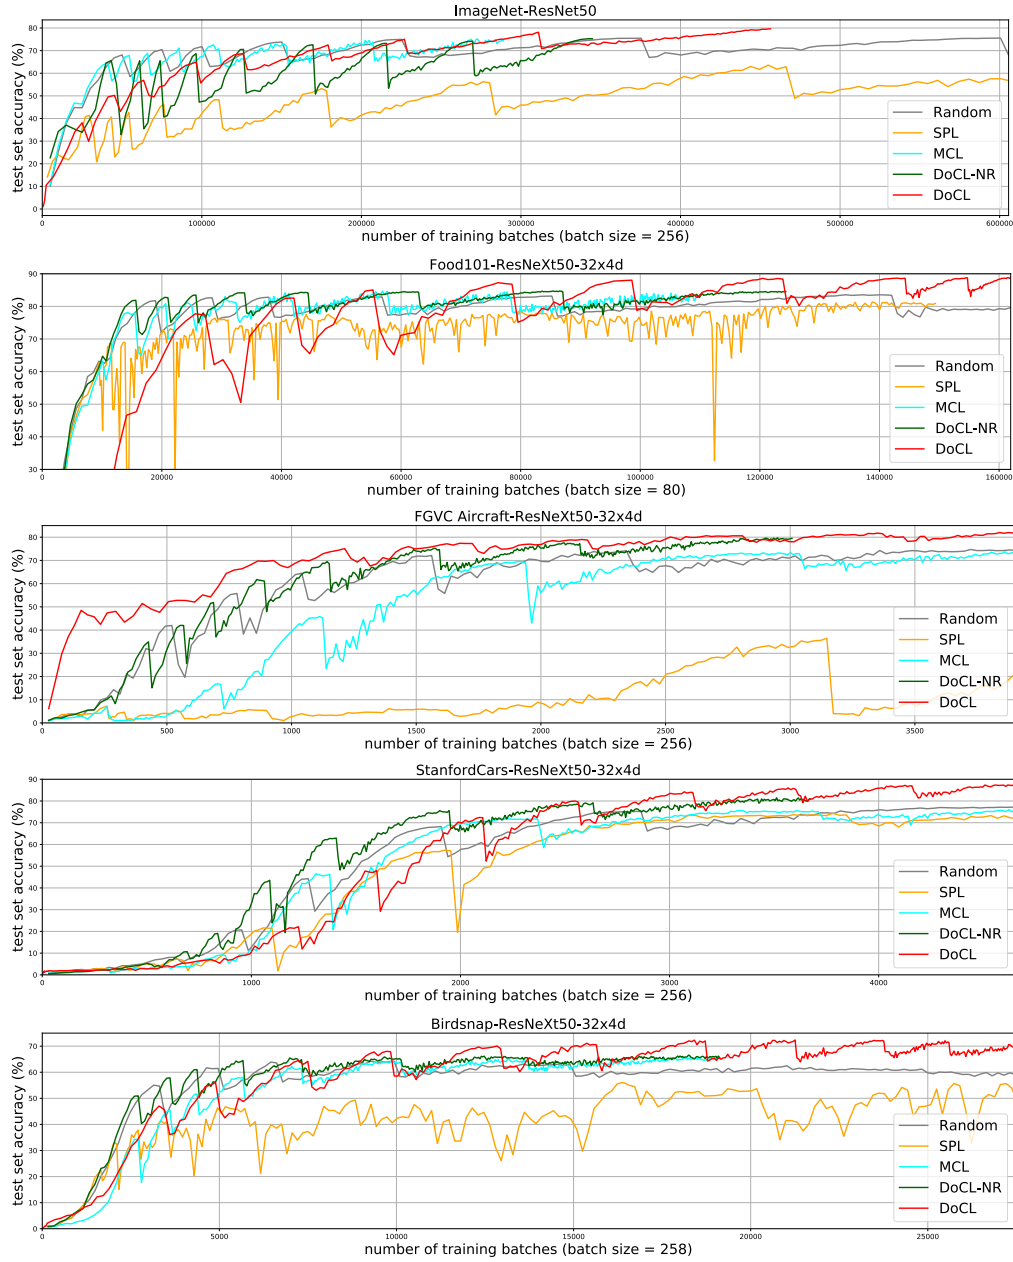

Figure 14: Training DNNs by using DoCL, DoCL-NR, SPL [31], MCL [59], and random mini-batch SGD on 3 datasets, i.e., ImageNet, Food101, FGVC Aircraft, Stanford Cars and Birdsnap. We report how the test accuracy changes with the number of training batches for each method.
